# Supplementary material for: Low Rates of HIV Testing Among Adults With Severe Mental Illness Receiving Care in Community Mental Health Settings
Source: Atypon-hosted journal article supplement (doi:10.1176/appi.ps.201600248), 2017-01-17
Supplement: appi.ps.201600248.ds001.pdf [file appi.ps.201600248.ds001.pdf]

The medications included in this study were extracted by the California Department of Health Care Services (DHCS) Medi-Cal pharmacy data based on general therapeutic category (GTC) and selective therapeutic category (STC). The following is a list of antipsychotic medications (GTC 80 “psychotherapeutic drugs” that are included in this study:

**Supplemental Table 1: Antipsychotic medications**

| <b>Antipsychotic medication class</b> | <b>Selective therapeutic category name (code)</b>    | <b>Specific medication</b>                                                                                                                                                                                                                         |
|---------------------------------------|------------------------------------------------------|----------------------------------------------------------------------------------------------------------------------------------------------------------------------------------------------------------------------------------------------------|
| First-generation antipsychotics       | Dopamine antagonists, butyrophenones (9153)          | Droperidol<br>Haloperidol; haloperidol decanoate; haloperidol lactate                                                                                                                                                                              |
|                                       | Dopamine antagonists, thioxanthenes (9154)           | Chlorprothixene<br>Thiothixene; thiothixene HCL                                                                                                                                                                                                    |
|                                       | Dopamine antagonists, diphenylbutypiperidines (9156) | Pimozide                                                                                                                                                                                                                                           |
|                                       | Dopamine antagonist, dihydroindolones (9157)         | Molindone HCL                                                                                                                                                                                                                                      |
|                                       | Dopamine & serotonin antagonists (9159)              | Loxapine HCL, loxapine succinate                                                                                                                                                                                                                   |
| Second-generation antipsychotics      | Atypical, dopamine & serotonin antagonist (9158)     | Asenapine maleate<br>Clozapine<br>Iloperidone<br>Lurasidone HCL<br>Olanzapine; olanzapine pamoate<br>Paliperidone; paliperidone palmitate<br>Quetiapine fumarate<br>Risperidone, risperidone microspheres<br>Ziprasidone HCL, ziprasidone mesylate |
|                                       | Atypical, D2 partial agonist/5HT mixed (9851)        | Aripiprazole                                                                                                                                                                                                                                       |
